# Supplementary material for: Ethosomes and Transethosomes as Cutaneous Delivery Systems for Quercetin: A Preliminary Study on Melanoma Cells
Source: MDPI journal article supplement (doi:10.3390/pharmaceutics14051038), 2022-05-11
Supplement: s1 [file s1]

# Ethosomes and transethosomes as cutaneous delivery systems for quercetin: a preliminary study on melanoma cells

Francesca Ferrara, Mascia Benedusi, Maddalena Sguizzato, Rita Cortesi, Anna Baldisserotto, Raissa Buzzi, Giuseppe Valacchi\*, and Elisabetta Esposito\*

**Table S1.** Membranes employed for in vitro release (IVRT) and permeation (IVPT) tests

|                 | IVRT                 |                              | IVPT                            |                               |
|-----------------|----------------------|------------------------------|---------------------------------|-------------------------------|
| Characteristics | NY                   | PTFE                         | STRAT-M®                        | SCE                           |
| composition     | nylon<br>(polyamide) | polytetra<br>-fluoroethylene | polyethersulfone<br>-polyolefin | stratum corneum-<br>epidermis |
| character       | hydrophilic          | lipophilic                   | amphiphilic                     | amphiphilic                   |
| pore size (μm)  | 0.22                 | 0.22                         | n.a.                            | n.a.                          |
| thickness (μm)  | 150–187 <sup>a</sup> | 156 <sup>a</sup>             | 317 <sup>a</sup>                | 22 <sup>b</sup>               |

n.a.: not available; a: as indicated by the supplier; b: as measured by SEM

**Table S2:** Mathematical parameters describing QT release evaluated from IVRT data.

| Formulation code                      | Order of process | c       | m      | R <sup>2</sup> |
|---------------------------------------|------------------|---------|--------|----------------|
| ETO <sub>0.9</sub> -QT <sup>N</sup>   | Zero order       | -0.3080 | 0.0099 | 0.9948         |
|                                       | First order      | -0.2900 | 0.1810 | 0.9162         |
|                                       | Higuchi          | -1.2760 | 2.6513 | 0.9369         |
| T-ETO <sub>0.9</sub> -QT <sup>N</sup> | Zero order       | -0.3485 | 0.4885 | 0.9936         |
|                                       | First order      | -0.8549 | 0.2210 | 0.8751         |
|                                       | Higuchi          | -1.6367 | 0.8651 | 0.9271         |
| T-ETO <sub>2.7</sub> -QT <sup>N</sup> | Zero order       | -0.8961 | 1.1840 | 0.9834         |
|                                       | First order      | -0.7301 | 0.2670 | 0.8883         |
|                                       | Higuchi          | -1.8371 | 3.0182 | 0.8900         |
| ETO <sub>0.9</sub> -QT <sup>P</sup>   | Zero order       | 0.5911  | 0.0123 | 0.9877         |
|                                       | First order      | 0.2680  | 0.0130 | 0.9299         |
|                                       | Higuchi          | -1.1290 | 3.3682 | 0.9715         |
| T-ETO <sub>0.9</sub> -QT <sup>P</sup> | Zero order       | 1.4880  | 0.0131 | 0.9846         |
|                                       | First order      | 0.5024  | 0.0764 | 0.9491         |
|                                       | Higuchi          | -0.5341 | 4.0566 | 0.9814         |
| T-ETO <sub>2.7</sub> -QT <sup>P</sup> | Zero order       | 1.0000  | 1.6167 | 0.9809         |
|                                       | First order      | 0.3969  | 0.1033 | 0.8904         |
|                                       | Higuchi          | -1.3650 | 4.8913 | 0.9760         |

N: Nylon membrane; P: PTFE membrane

**Table S3:** IVPT parameters of the indicated forms determined by Franz cell associated to STRAT-M®

| Formulation code         | Jss <sup>1</sup><br>( $\mu\text{g cm}^{-2} \text{h}^{-1}$ ) | T <sub>lag</sub> <sup>2</sup><br>(h) | Kp <sup>3</sup><br>( $\text{cm h}^{-1} 10^{-3}$ ) | D <sup>4</sup><br>( $\text{cm h}^{-1}$ ) $\times 10^{-7}$ | P <sup>5</sup><br>membrane/vehicle | A <sub>QT</sub> <sup>6</sup><br>( $\mu\text{g cm}^{-2}$ ) | M <sub>QT</sub> <sup>7</sup><br>( $\mu\text{g cm}^{-2}$ ) |
|--------------------------|-------------------------------------------------------------|--------------------------------------|---------------------------------------------------|-----------------------------------------------------------|------------------------------------|-----------------------------------------------------------|-----------------------------------------------------------|
| ETO <sub>0.9</sub> -QT   | 0.09 ± 0.01                                                 | 3.01 ± 0.21                          | 0.18 ± 0.01                                       | 5.0 ± 0.2                                                 | 11.41 ± 1.21                       | 3.0 ± 0.2                                                 | 15 ± 1.0                                                  |
| T-ETO <sub>0.9</sub> -QT | 0.45 ± 0.05                                                 | 2.82 ± 0.11                          | 0.90 ± 0.05                                       | 6.0 ± 0.2                                                 | 47.55 ± 2.00                       | 4.8 ± 1.2                                                 | 18 ± 2.0                                                  |
| T-ETO <sub>2.7</sub> -QT | 0.05 ± 0.01                                                 | 3.21 ± 0.20                          | 0.10 ± 0.01                                       | 5.2 ± 0.3                                                 | 6.09 ± 0.42                        | 2.9 ± 0.9                                                 | 20 ± 2.5                                                  |
| SOL-QT                   | 0.33 ± 0.09                                                 | 2.10 ± 0.21                          | 0.66 ± 0.09                                       | 8.0 ± 0.1                                                 | 26.15 ± 3.43                       | 2.4 ± 1.0                                                 | 12 ± 1.5                                                  |

1: steady state flux per unit area, 2: lag time; 3: permeability coefficient; 4: diffusion coefficient; 5: partition coefficient; 6: cumulative amount of QT diffused at 24 h; 7: QT associated to the membrane after 24 h; data are the mean of 12 independent Franz cell experiments ± s.d..

**Table S4:** IVPT parameters of the indicated forms determined by Franz cell associated to SCE

| Formulation code         | Jss <sup>1</sup><br>( $\mu\text{g cm}^{-2} \text{h}^{-1}$ ) | T <sub>lag</sub> <sup>2</sup><br>(h) | Kp <sup>3</sup><br>( $\text{cm h}^{-1} 10^{-3}$ ) | A <sub>QT</sub> <sup>4</sup><br>( $\mu\text{g cm}^{-2}$ ) | M <sub>QT</sub> <sup>5</sup><br>( $\mu\text{g cm}^{-2}$ ) |
|--------------------------|-------------------------------------------------------------|--------------------------------------|---------------------------------------------------|-----------------------------------------------------------|-----------------------------------------------------------|
| ETO <sub>0.9</sub> -QT   | 0.60 ± 0.08                                                 | 1.90 ± 0.10                          | 1.20 ± 0.08                                       | 4.8 ± 0.5                                                 | 24 ± 1.5                                                  |
| T-ETO <sub>0.9</sub> -QT | 1.20 ± 0.10                                                 | 1.15 ± 0.11                          | 2.40 ± 0.10                                       | 10.0 ± 1.2                                                | 30 ± 2.0                                                  |
| T-ETO <sub>2.7</sub> -QT | 1.09 ± 0.01                                                 | 2.10 ± 0.22                          | 2.18 ± 0.01                                       | 7.0 ± 0.7                                                 | 28 ± 3.2                                                  |
| SOL-QT                   | 0.19 ± 0.15                                                 | 1.13 ± 0.51                          | 0.38 ± 0.20                                       | 1.6 ± 0.2                                                 | 16 ± 3.5                                                  |

1: steady state flux per unit area, 2: lag time; 3: permeability coefficient; 4: cumulative amount of QT diffused at 24 h; 5: QT associated to the membrane after 24 h; data are the mean of 12 independent Franz cell experiments ± s.d..

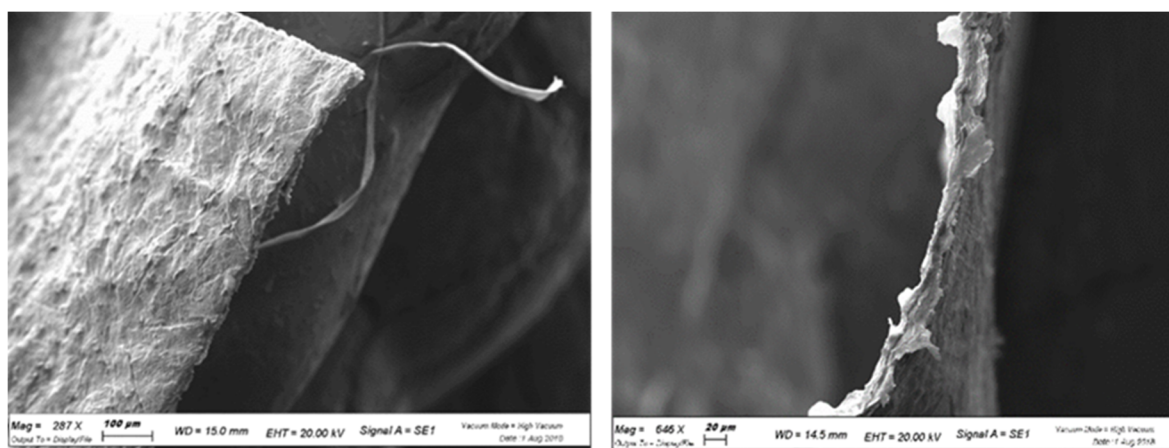

(a)

(b)

**Figure S1.** SEM images of human SCE membranes employed for IVPT. SCE samples were prepared as reported in section 2.7.

(a)

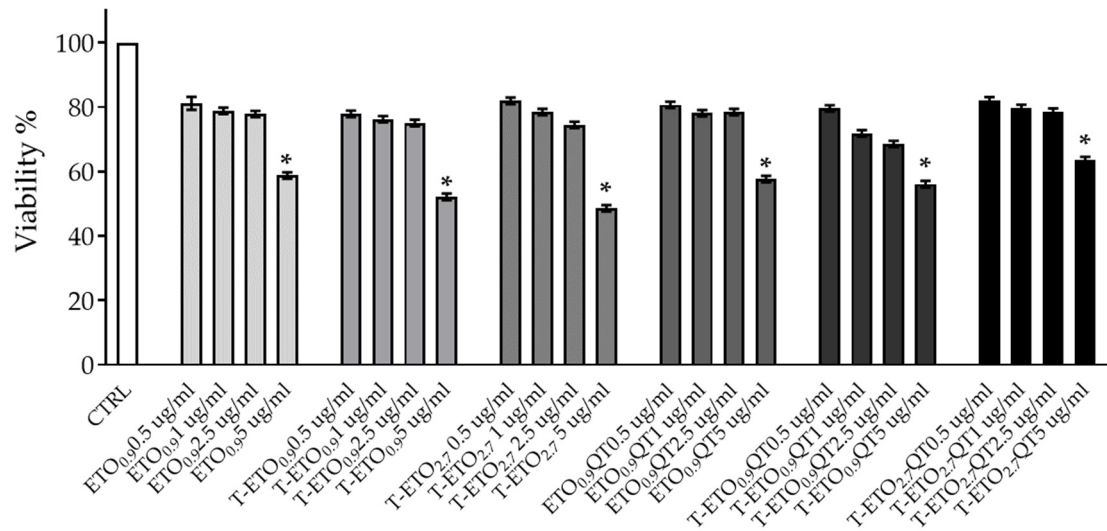

(b)

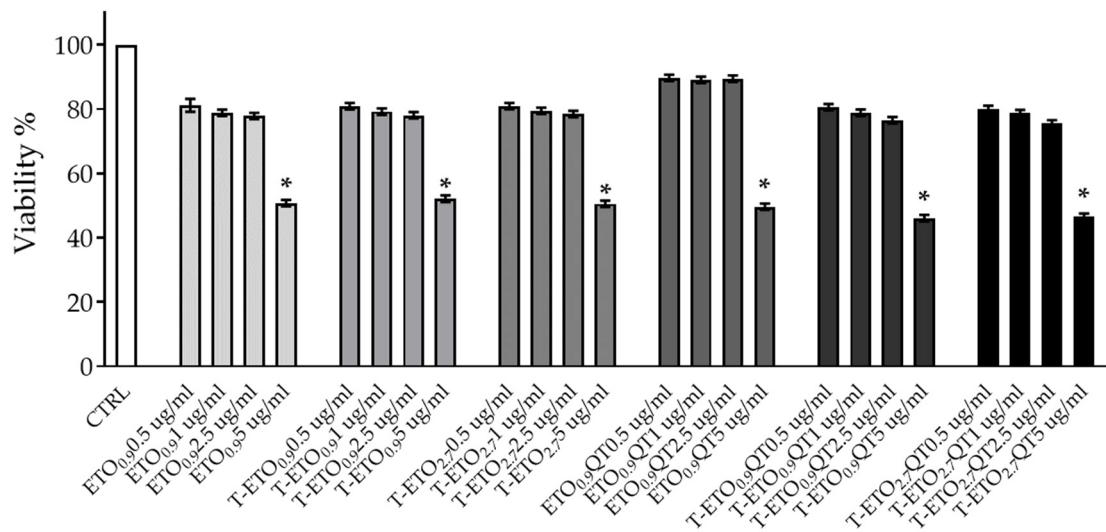

**Figure S2.** HaCaT cell (a) and HT-144 melanoma cells (b) viability evaluated by MTT test after 24 h of treatment with QT-loaded or unloaded ETO<sub>0.9</sub>, T-ETO<sub>0.9</sub> and T-ETO<sub>2.7</sub>. Data are the results of three independent experiments performed in triplicate. Data appear as the mean±SE. \* p < 0.05 by two-way ANOVA (Post hoc test: Tukey Test) Ctrl vs treated cells.

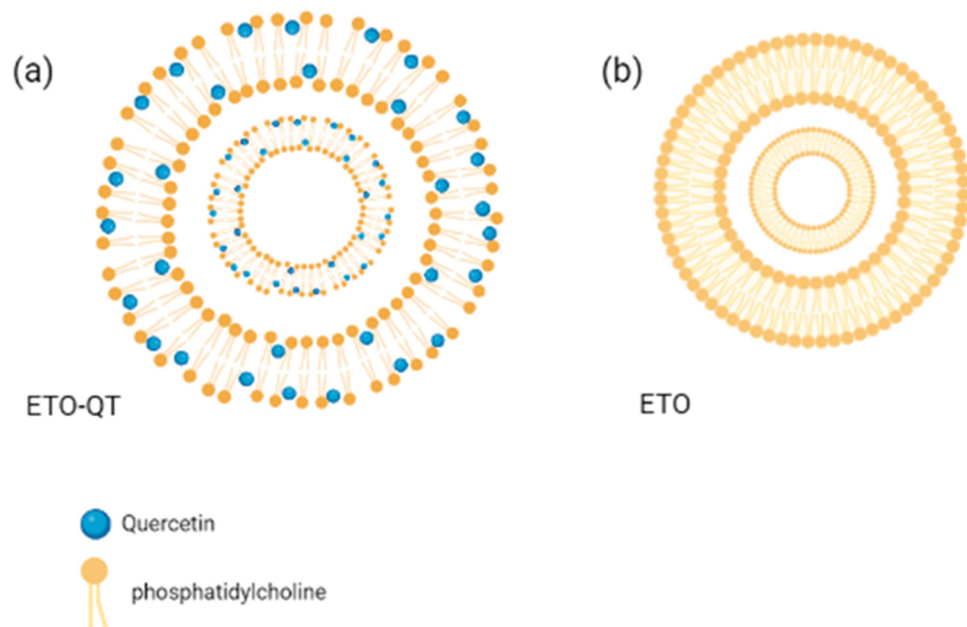

**Figure S3:** Graphical representation showing the possible QT positioning within PC bilayers, resulting in larger vesicles in the case of loaded (a) with respect to unloaded (b) ethosomes.

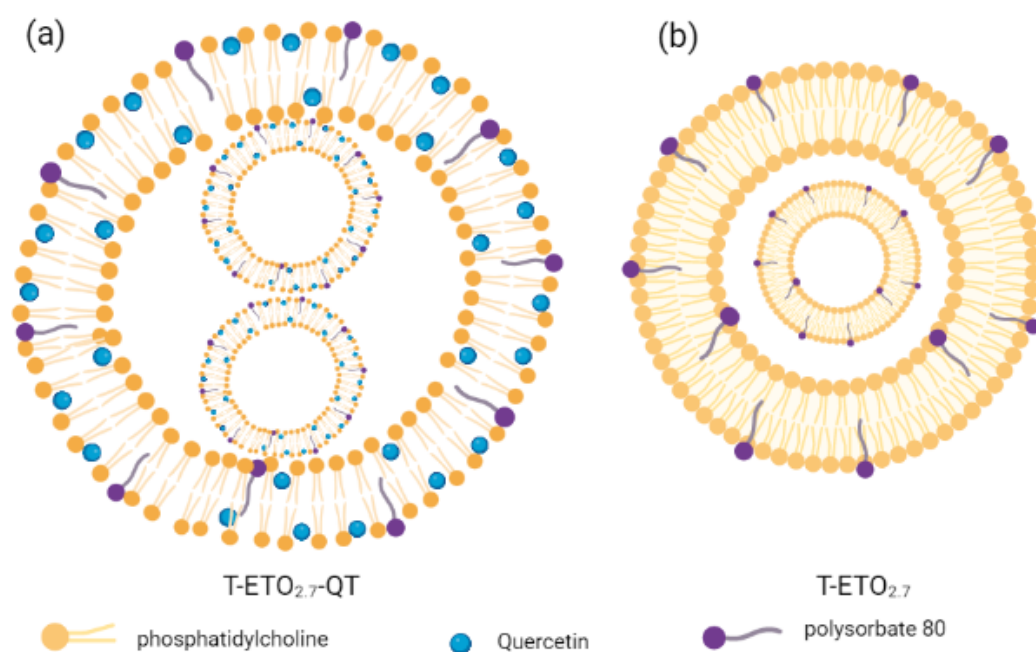

**Figure S4:** Graphical representation showing the possible architectural organization of T-ETO<sub>2.7</sub> (a). The presence of polysorbate 80 could stabilize the vesicles, possibly improving QT interaction with PC in T-ETO<sub>2.7</sub>-QT (b).
